# Supplementary material
Source: PubMed Central journal article supplement (PMC9630095)
Supplement: 41409_2022_1776_MOESM1_ESM.pdf [file 41409_2022_1776_MOESM1_ESM.pdf]

## Supplemental Tables

Supplemental Table 1. Patient and disease characteristics stratified by alloSCT.

| Characteristic                                                                                          | No alloSCT<br>(n = 16) | alloSCT<br>(n = 13) | <i>p</i> |
|---------------------------------------------------------------------------------------------------------|------------------------|---------------------|----------|
| Age at diagnosis (years)                                                                                |                        |                     | <0.001   |
| Median                                                                                                  | 75                     | 63                  |          |
| Range                                                                                                   | 50-82                  | 54-70               |          |
| Gender, n(%)                                                                                            |                        |                     | 0.364    |
| Female                                                                                                  | 6 (37.5%)              | 2 (15.4%)           |          |
| Male                                                                                                    | 10 (62.5%)             | 11 (84.6%)          |          |
| Disease, n(%)                                                                                           |                        |                     | 0.047    |
| MDS                                                                                                     | 14 (87.5%)             | 6 (46.2%)           |          |
| AML                                                                                                     | 2 (12.5%)              | 7 (53.8%)           |          |
| MDS R-IPSS risk*, n = 20(%)                                                                             |                        |                     | 0.967    |
| Low                                                                                                     | 2 (14.3%)              | 1 (16.7%)           |          |
| Intermediate                                                                                            | 9 (64.3%)              | 4 (66.7%)           |          |
| High                                                                                                    | 3 (21.4%)              | 1 (16.7%)           |          |
| AML ELN risk*, n = 9(%)                                                                                 |                        |                     | NA       |
| Favorable                                                                                               | 0                      | 0                   |          |
| Intermediate                                                                                            | 2 (100%)               | 7 (100%)            |          |
| Adverse                                                                                                 | 0                      | 0                   |          |
| Karyotype                                                                                               |                        |                     | NA       |
| Normal                                                                                                  | 13 (81.25%)            | 13 (100%)           |          |
| Abnormal                                                                                                | 3 (18.75%)             | 0                   |          |
| Complex                                                                                                 | 0                      | 0                   |          |
| Abbreviations: R-IPSS: Revised International Prognostic Scoring System, ELN: European Leukemia Network. |                        |                     |          |
| *Risk stratification at diagnosis.                                                                      |                        |                     |          |

**Supplemental Table 2. Mutational profile of *DDX41* and other associated pathogenic mutations.**

| <i>DDX41</i> , pathogenic mutations                                        | VAF range     | Number of patients (%)* |
|----------------------------------------------------------------------------|---------------|-------------------------|
| c.1574G>A                                                                  | 7-19          | 9                       |
| c.3G>A                                                                     | 48-52         | 8                       |
| c.415_418dup                                                               | 37-45         | 5                       |
| c.1589G>A                                                                  | 28-46         | 2                       |
| c.260del                                                                   | 7             | 1                       |
| c.1102C>T                                                                  | 49            | 1                       |
| c.121C>T                                                                   | 51            | 1                       |
| c.1588G>A                                                                  | 6             | 1                       |
| c.305_306del                                                               | 46            | 1                       |
| c.434+1G>A                                                                 | 46            | 1                       |
| c.776A>G                                                                   | 51            | 1                       |
| c.931C>T                                                                   | 48            | 1                       |
| c.946_947del                                                               | 47            | 1                       |
| <i>DDX41</i> , variance of unknown significance                            | VAF           | Number of patients      |
| c.773C>T                                                                   | 46            | 2                       |
| c.710T>G                                                                   | 46            | 1                       |
| c.517G>A                                                                   | 50            | 1                       |
| c.959C>T                                                                   | 49            | 1                       |
| c.610C>T                                                                   | 40            | 1                       |
| c.622C>G                                                                   | 11            | 1                       |
| c.1032C>G                                                                  | 7             | 1                       |
| Other associated genes with known pathogenic mutations                     | Gene          | Number of patients      |
|                                                                            | <i>ASXL1</i>  | 4                       |
|                                                                            | <i>DNMT3A</i> | 3                       |
|                                                                            | <i>EZH2</i>   | 2                       |
|                                                                            | <i>JAK2</i>   | 1                       |
|                                                                            | <i>NRAS</i>   | 1                       |
|                                                                            | <i>PHF6</i>   | 1                       |
|                                                                            | <i>SF3B1</i>  | 1                       |
| Abbreviations: VAF: Variant Allele Frequency                               |               |                         |
| *Total number is >29 due to few patients having >1 <i>DDX41</i> mutations. |               |                         |

**Supplemental Table 3. Patient characteristics, transplant characteristics and transplant outcomes stratified by patient alive or dead at last follow-up.**

| Characteristic                                                                                                                                            | Alive at last follow-up<br>(n = 8) | Dead at last follow-up<br>(n = 5) |
|-----------------------------------------------------------------------------------------------------------------------------------------------------------|------------------------------------|-----------------------------------|
| Age at alloSCT (years)                                                                                                                                    |                                    |                                   |
| Median                                                                                                                                                    | 66                                 | 63                                |
| Range                                                                                                                                                     | 54-71                              | 60-67                             |
| Median HCT-CI (Range)                                                                                                                                     | 1 (0 – 5)                          | 0 (0 – 4)                         |
| Disease                                                                                                                                                   |                                    |                                   |
| MDS                                                                                                                                                       | 4 (50%)                            | 2 (40%)                           |
| AML                                                                                                                                                       | 4 (50%)                            | 3 (60%)                           |
| Prior lines of treatment                                                                                                                                  |                                    |                                   |
| One                                                                                                                                                       | 4 (50%)                            | 3 (60%)                           |
| Two                                                                                                                                                       | 4 (50%)                            | 2 (40%)                           |
| Donor source                                                                                                                                              |                                    |                                   |
| Unrelated donor                                                                                                                                           | 4 (50%)                            | 4 (80%)                           |
| Matched related donor                                                                                                                                     | 2 (25%)                            | 1 (20%)                           |
| Haploidentical                                                                                                                                            | 2 (25%)                            | 0                                 |
| Conditioning regimen (intensity)                                                                                                                          |                                    |                                   |
| Busulfan and fludarabine (MAC)                                                                                                                            | 1 (12.5%)                          | 0                                 |
| Busulfan and fludarabine (RIC)                                                                                                                            | 2 (25%)                            | 2 (40%)                           |
| Fludarabine and melphalan (RIC)                                                                                                                           | 3 (37.5)                           | 3 (60%)                           |
| Fludarabine, cyclophosphamide and TBI (RIC)                                                                                                               | 2 (25%)                            | 0                                 |
| GVHD prophylaxis                                                                                                                                          |                                    |                                   |
| PTCY based                                                                                                                                                | 2 (25%)                            | 2 (40%)                           |
| Tacrolimus-methotrexate                                                                                                                                   | 6 (75%)                            | 3 (60%)                           |
| Acute GVHD                                                                                                                                                |                                    |                                   |
| Grade 2-4                                                                                                                                                 | 4 (50%)                            | 3 (60%)                           |
| Grade 3-4                                                                                                                                                 | 1 (12.5%)                          | 1 (20%)                           |
| Chronic GVHD                                                                                                                                              |                                    |                                   |
| Mild                                                                                                                                                      | 0                                  | 0                                 |
| Moderate                                                                                                                                                  | 3 (37.5%)                          | 1 (20%)                           |
| Severe                                                                                                                                                    | 0                                  | 1 (20%)                           |
| Relapse                                                                                                                                                   | 1 (12.5%)                          | 0                                 |
| Abbreviations: MAC: Myeloablative conditioning, PTCY: Post-transplant cyclophosphamide, RIC: Reduced intensity conditioning, TBI: Total body irradiation. |                                    |                                   |
